# Supplementary material for: Compliance with pathology testing guidelines in Australian general practice: protocol for a secondary analysis of electronic health record data
Source: PubMed Central journal article supplement — BMJ Open. 2018 Nov 13;8(11):e024223. doi: 10.1136/bmjopen-2018-024223 (PMC6252775; doi:10.1136/bmjopen-2018-024223), 2018-11-13
Supplement: bmjopen-2018-024223.draft_revisions.pdf [file bmjopen-2018-024223.draft_revisions.pdf]

# BMJ Open

BMJ Open is committed to open peer review. As part of this commitment we make the peer review history of every article we publish publicly available.

When an article is published we post the peer reviewers' comments and the authors' responses online. We also post the versions of the paper that were used during peer review. These are the versions that the peer review comments apply to.

The versions of the paper that follow are the versions that were submitted during the peer review process. They are not the versions of record or the final published versions. They should not be cited or distributed as the published version of this manuscript.

BMJ Open is an open access journal and the full, final, typeset and author-corrected version of record of the manuscript is available on our site with no access controls, subscription charges or pay-per-view fees (<http://bmjopen.bmj.com>).

If you have any questions on BMJ Open's open peer review process please email [editorial.bmjopen@bmj.com](mailto:editorial.bmjopen@bmj.com)

# BMJ Open

## Compliance with pathology testing guidelines in Australian general practice: protocol for a secondary analysis of electronic health record data

|                               |                                                                                                                                                                                                                                                                                                                                                                                                                                                                                                                                                                                                                                                                                                                                                                                                                                                                                                                                                                                                                                                                                                                                                                                                                                                                                                                                                                                                                                                                                                                                                                                                                             |
|-------------------------------|-----------------------------------------------------------------------------------------------------------------------------------------------------------------------------------------------------------------------------------------------------------------------------------------------------------------------------------------------------------------------------------------------------------------------------------------------------------------------------------------------------------------------------------------------------------------------------------------------------------------------------------------------------------------------------------------------------------------------------------------------------------------------------------------------------------------------------------------------------------------------------------------------------------------------------------------------------------------------------------------------------------------------------------------------------------------------------------------------------------------------------------------------------------------------------------------------------------------------------------------------------------------------------------------------------------------------------------------------------------------------------------------------------------------------------------------------------------------------------------------------------------------------------------------------------------------------------------------------------------------------------|
| Journal:                      | <i>BMJ Open</i>                                                                                                                                                                                                                                                                                                                                                                                                                                                                                                                                                                                                                                                                                                                                                                                                                                                                                                                                                                                                                                                                                                                                                                                                                                                                                                                                                                                                                                                                                                                                                                                                             |
| Manuscript ID                 | bmjopen-2018-024223                                                                                                                                                                                                                                                                                                                                                                                                                                                                                                                                                                                                                                                                                                                                                                                                                                                                                                                                                                                                                                                                                                                                                                                                                                                                                                                                                                                                                                                                                                                                                                                                         |
| Article Type:                 | Protocol                                                                                                                                                                                                                                                                                                                                                                                                                                                                                                                                                                                                                                                                                                                                                                                                                                                                                                                                                                                                                                                                                                                                                                                                                                                                                                                                                                                                                                                                                                                                                                                                                    |
| Date Submitted by the Author: | 15-May-2018                                                                                                                                                                                                                                                                                                                                                                                                                                                                                                                                                                                                                                                                                                                                                                                                                                                                                                                                                                                                                                                                                                                                                                                                                                                                                                                                                                                                                                                                                                                                                                                                                 |
| Complete List of Authors:     | <p>Sezgin, Gorkem; Macquarie University Faculty of Medicine and Health Sciences, Centre for Health Systems and Safety Research, Australian Institute of Health Innovation</p> <p>Georgiou, A; Macquarie University, Australian Institute of Health Innovation</p> <p>Hardie, Rae-Anne; Macquarie University Faculty of Medicine and Health Sciences, Centre for Health Systems and Safety Research, Australian Institute of Health Innovation</p> <p>Li, Ling; Macquarie University Faculty of Medicine and Health Sciences, Centre for Health Systems and Safety Research, Australian Institute of Health Innovation</p> <p>Westbrook, Johanna; Macquarie University Faculty of Medicine and Health Sciences, Centre for Health Systems and Safety Research, Australian Institute of Health Innovation</p> <p>Pont, Lisa; University of Technology Sydney Faculty of Health; Macquarie University Faculty of Medicine and Health Sciences, Centre for Health Systems and Safety Research, Australian Institute of Health Innovation</p> <p>Badrick, Tony; Royal College of Pathologists of Australasia, QAP</p> <p>Franco, Guilherme; Macquarie University Faculty of Medicine and Health Sciences, Centre for Health Systems and Safety Research, Australian Institute of Health Innovation</p> <p>Rinehart, Natalie; Outcome Health</p> <p>McLeod, Adam; Outcome Health</p> <p>Pearce, Christopher; Outcome Health</p> <p>Shearer, Marianne; Gippsland Primary Health Network</p> <p>Whyte, Robin; Eastern Melbourne Primary Health Network</p> <p>Deveny, Elizabeth; South Eastern Melbourne Primary Health Network</p> |
| Keywords:                     | <p>Protocols &amp; guidelines &lt; HEALTH SERVICES ADMINISTRATION &amp; MANAGEMENT, Quality in health care &lt; HEALTH SERVICES ADMINISTRATION &amp; MANAGEMENT, Health informatics &lt; BIOTECHNOLOGY &amp; BIOINFORMATICS, PATHOLOGY, PRIMARY CARE</p>                                                                                                                                                                                                                                                                                                                                                                                                                                                                                                                                                                                                                                                                                                                                                                                                                                                                                                                                                                                                                                                                                                                                                                                                                                                                                                                                                                    |
|                               |                                                                                                                                                                                                                                                                                                                                                                                                                                                                                                                                                                                                                                                                                                                                                                                                                                                                                                                                                                                                                                                                                                                                                                                                                                                                                                                                                                                                                                                                                                                                                                                                                             |

SCHOLARONE™  
Manuscripts

1  
2  
3 **Compliance with pathology testing guidelines in Australian general practice: protocol for a**  
4 **secondary analysis of electronic health record data**

5  
6 Authors:

7 Gorkem Sezgin<sup>1</sup>, gorkem.sezgin@mq.edu.au, +61 2 9850 2490

8  
9 Georgiou, Andrew<sup>1</sup>

10  
11 Hardie, Rae-Anne<sup>1</sup>

12  
13 Li, Ling<sup>1</sup>

14  
15 Westbrook, Johanna I.<sup>1</sup>

16  
17 Pont, Lisa G.<sup>1,2</sup>

18  
19 Badrick, Tony<sup>3</sup>

20  
21 Franco, Guilherme S.<sup>1</sup>

22  
23 Rinehart, Natalie<sup>4</sup>

24  
25 McLeod, Adam<sup>4</sup>

26  
27 Pearce, Chris<sup>4</sup>

28  
29 Shearer, Marianne<sup>5</sup>

30  
31 Whyte, Robin<sup>6</sup>

32  
33 Deveny, Elizabeth<sup>7</sup>

34  
35 1 Centre for Health Systems and Safety Research, Australian Institute of Health Innovation,  
36 Macquarie University, Level 6, 75 Talavera Road, Macquarie University, NSW 2109, Australia

37  
38 2 Graduate School of Health, University of Technology Sydney, NSW 2007, Australia

39  
40 3 The Royal College of Pathologists of Australasia Quality Assurance Program, St Leonards, NSW  
41 2065, Australia

42  
43 4 Outcome Health, Burwood, VIC 3125, Australia

44  
45 5 Gippsland Primary Health Network, Moe, VIC 3825, Australia

46  
47 6 Eastern Melbourne Primary Health Network, Box Hill, VIC 3128, Australia

48  
49 7 South Eastern Melbourne Primary Health Network, Heatherton, VIC 3202, Australia

1  
2  
3 **Pathology testing in Australian general practice and compliance with guideline**  
4 **recommendations: A study protocol for a secondary analysis of electronic health record data**  
5

6  
7 **ABSTRACT**  
8

9  
10 **Introduction** In Australia, general practitioners usually provide the first point of contact for patients  
11 with non-urgent medical conditions. Appropriate and efficient utilisation of pathology tests by general  
12 practitioners forms a key part of diagnosis and monitoring. However over- and under- utilisation of  
13 pathology tests have been reported across several tests and conditions, despite evidence-based  
14 guidelines outlining best practice in pathology testing. There are a limited number of studies  
15 evaluating the impact of these guidelines on pathology testing in general practice. The aim of our  
16 quantitative observational study is to define how pathology tests are used in general practice and  
17 investigate how test ordering practices align with evidence-based pathology guidelines.  
18  
19

20  
21 **Methods and analysis** Access to non-identifiable patient data will be obtained through electronic  
22 health records from general practices across three primary health networks in Victoria, Australia.  
23 Numbers and characteristics of patients, general practices, encounters, pathology tests, and problems  
24 managed over time will be described. Overall rates of encounters and tests, alongside more detailed  
25 investigation between subcategories (encounter year, patient's age, gender, and location, and general  
26 practice size) will also be undertaken. To evaluate how general practitioner test ordering coincides  
27 with evidence-based guidelines, five key candidate indicators will be investigated: full blood counts  
28 for patients on clozapine medication; international normalised ratio (INR) measurements for patients  
29 on warfarin medication; glycated haemoglobin (HbA1c) testing for monitoring diabetes; vitamin D  
30 testing; and thyroid function testing.  
31  
32  
33  
34  
35  
36  
37  
38  
39  
40  
41  
42  
43  
44  
45

46  
47 **Ethics and dissemination** Ethics clearance to collect data from general practice facilities has been  
48 obtained by the data provider from the RACGP National Research and Evaluation Ethics Committee  
49 (NREEC 17-008). Approval for the research group to use these data has been obtained from  
50 Macquarie University (5201700872). This study is funded by the Australian Government Department  
51 of Health Quality Use of Pathology Program (Agreement ID: 4-2QFVW4M). Findings will be  
52  
53  
54  
55  
56  
57  
58  
59  
60

1  
2  
3 reported to the Department of Health and disseminated in peer-reviewed academic journals and  
4 presentations (national and international conferences, industry forums).  
5  
6

## 7 **STRENGTHS AND LIMITATIONS OF THIS STUDY**

### 8

### 9

- 10 • The study population will be drawn from a large region in Victoria, Australia, and is expected  
11 to contain a large sample population (data from approximately 350 general practices), along  
12 with a large number of demographic variables (e.g., region, gender, age).  
13  
14
- 15 • Electronic health records contain a vast amount of information on patients, allowing us to  
16 control for potential interacting or predictive variables on patient outcomes using statistical  
17 modelling.  
18  
19
- 20 • Some electronic health record fields may not be completely standardised across practices and  
21 could contain inconsistencies and missing information; which may limit the volume of data  
22 that can be extracted and analysed.  
23  
24
- 25 • Some medications being investigated in this study may be prescribed and/or monitored by  
26 specialists, which may result in cases being missed.  
27  
28  
29  
30  
31

## 32 **INTRODUCTION**

### 33

### 34

35 In Australia, general practitioners (GPs) are usually the first point of contact for patients with non-  
36 emergency health problems. They play an important role in the early detection, prevention (including  
37 shared-care arrangements) and treatment of disease (1). Pathology tests are a key part of general  
38 practice assisting GPs in diagnosing, screening, treating, and monitoring diseases. The past decade has  
39 seen an increase in both visits to and problems managed by GPs in Australia, resulting in an estimated  
40 24.2 million additional pathology tests being ordered in 2015-2016 compared to 2006-2007 (2).  
41  
42  
43  
44  
45  
46  
47  
48

49 Appropriate and timely utilisation of pathology tests can improve the quality and outcome of patient  
50 care. However, both over- and under- utilisation of pathology tests have been frequently observed in a  
51 range of clinical scenarios (3,4). Several guidelines have been established to encourage better  
52 utilisation of pathology tests among GPs across Australia, the US, Canada, and the UK. These include  
53  
54  
55  
56  
57  
58  
59  
60

1  
2  
3 initiatives such as *Choosing Wisely* (5), *National Institute for Health and Clinical Excellence (NICE)*  
4 (6), and *Royal Australian College of General Practitioners (RACGP) Guidelines for preventative*  
5 *activities in general practice* (7). Currently, there is little evidence on how test ordering practices by  
6  
7 GPs align with these recommendations and guidelines in Australia, and elsewhere. A survey of 600  
8  
9 US doctors revealed only 21% of doctors were familiar with the *Choosing Wisely* campaign.  
10  
11 However doctors aware of the campaign had a lower proportion of unnecessary pathology testing (8).  
12  
13 In Australia, increased awareness of best-practice in vitamin D test ordering is reported to have  
14  
15 contributed to a reduction in healthcare costs and potentially unnecessary tests (9). Considering the  
16  
17 importance of pathology testing for managing diseases, a better understanding of how pathology  
18  
19 testing by GPs coincides with evidence-based guidelines will be invaluable for the success of  
20  
21 management and disease-prevention strategies.  
22  
23  
24  
25

26  
27 Until recently, the survey-based *Bettering the Evaluation and Care of Health (BEACH)* study  
28  
29 provided the most comprehensive data on Australian GP activity (2). However, its cross-sectional  
30  
31 design prevented it from reporting longitudinal patient level changes and outcomes. The BEACH  
32  
33 study was discontinued in 2016, and has since left a gap in our understanding of GP activity;  
34  
35 particularly in relation to pathology test ordering. The extensive use of computers by Australian GPs  
36  
37 has prompted interest in the use of electronic health record (EHR) data as a research source for  
38  
39 monitoring the quality of GP services, and has led to research and publications based on EHR data  
40  
41 (10). The Australian Department of Health funded NPS Medicinewise MedicinesInsight dataset  
42  
43 contains a national collection of electronic health records (EHRs) from 650 practices covering over  
44  
45 3,300 GPs and nearly 3.6 million active patients (11). This dataset has been used in several population  
46  
47 health research projects, and has demonstrated the value of EHR data in research (12). This study will  
48  
49 use EHR data from the POLAR Data Space, containing de-identified data from consenting general  
50  
51 practices collected on behalf of Australian PHNs from approximately 350 practices. POLAR Data  
52  
53 Space has added measures to ensure robust and accurate data, and implements standardised  
54  
55 terminologies to make the data more approachable for research use. This study, undertaken in  
56  
57 collaboration with POLAR Data Space Research Consortia and its associated Primary Health  
58  
59  
60

1  
2  
3 Networks (PHNs), will facilitate a comprehensive analyses of general practice activity and its  
4 relationship to pathology testing in Australia through EHR data.  
5  
6  
7

### 8 **Objectives:**

9  
10  
11  
12 The objectives of this study are to:

- 13  
14 1. Describe general practice activity and characteristics of pathology test ordering based on  
15 electronic health record data;
- 16  
17 2. Investigate compliance with evidence-based guidelines to determine the appropriateness and  
18 quality use of pathology in general practice.  
19  
20  
21  
22

## 23 **METHODS AND ANALYSES**

### 24 **Study design**

25  
26  
27 A retrospective observational study of Australian general practice health records and pathology  
28 testing data.  
29  
30  
31  
32

### 33 **Data source**

34  
35  
36 Data to be used in this study will be provided by the POLAR Data Space (10). POLAR Data Space  
37 collects de-identified data from consenting general practices on behalf of Australian PHNs: including  
38 Gippsland, Eastern Melbourne, and South Eastern Melbourne PHNs. Data are extracted from  
39 approximately 350 practices in urban and rural regions in Victoria, Australia. The primary purpose of  
40 the data collection is to provide information to improve patient care at the practice level and  
41 population health initiatives at the PHN level. POLAR Data Space has ethics approval for the  
42 collection, storage and de-identification of the data which it makes available for approved research  
43 governed by the involved PHNs.  
44  
45  
46  
47  
48  
49  
50  
51  
52

53 The data source will include pooled general practice patient data extracted from Best Practice,  
54 Medical Director, and Zedmed EHRs. Data will include de-identified demographic information about  
55  
56  
57  
58  
59  
60

1  
2  
3 patients and general practices, as well as visit records (diagnosis, past history, medications) and  
4 pathology test records (test name and result). Both historical and current information about patients  
5 will be acquired, providing a longitudinal record.  
6  
7

### 8 9 **Study Population**

10  
11 The study population will consist of all patients who visited any of the general practices included in  
12 the study, and had their visit recorded in the practices' EHR software.  
13  
14

### 15 16 **Variables**

17  
18 The following criteria will be adopted to accurately describe general practice activity and ensure data  
19 quality: (i) A patient will be distinguished by a unique (non-identifiable) patient code recorded within  
20 a general practice and included if determined to be an active patient (i.e. has visited the GP three or  
21 more times in the past two years, not deceased; (ii) An encounter (i.e. consultation, visit) will be  
22 defined as a patient visit recorded by a doctor or nurse during which an action (e.g. consultation,  
23 prescription) is performed, and will be identified through a variable indicating the visit type (e.g.  
24 surgery, administrative, phone call); (iii) A pathology test will be defined as either a panel of  
25 interrelated tests (e.g. full blood count) or an individual test (e.g. troponin test); (iv) Where possible,  
26 standardised records such as Logical Observation Identifiers Names and Codes (LOINC) and  
27 Systematized Nomenclature of Medicine (SNOMED) terminologies will be prioritised to identify  
28 variables; otherwise, free-text data will be searched for terms of interest (e.g. "diabetes" or its  
29 abbreviated forms in the diagnosis field, excluding "not diabetes").  
30  
31  
32  
33  
34  
35  
36  
37  
38  
39  
40  
41  
42  
43

### 44 **Analyses**

45  
46 Data examination and analysis will be performed using Stata/MP 15.1 (StataCorp, College Station,  
47 Texas, USA). The methods outlined in this protocol are structured according to the *Strengthening the*  
48 *Reporting of Observational Studies in Epidemiology* (STROBE) checklist of items to be included in  
49 observational studies (13).  
50  
51  
52  
53

### 54 ***Characteristics of general practice activity and pathology testing***



1  
2  
3 In line with Objective 1 of this study, we will analyse and describe Australian general practice  
4 characteristics and activity. These characteristics can subsequently be compared to reports on national  
5 demographics and healthcare statistics, such as *Australian Institute of Health and Welfare's* (AIHW)  
6 annual reports.  
7  
8  
9

10  
11 Sample population characteristics will be reported. This will include describing the characteristics of  
12 patients, general practices, encounters, tests, and problems managed across time. Subsequent analyses  
13 will describe overall median rates of encounters and tests, alongside more detailed investigation  
14 between subcategories (encounter year, patient's age, gender, and postcode, and number of active  
15 general practitioners in practice) using the following indicators: encounters per patient per year, and  
16 tests per encounter.  
17  
18  
19  
20  
21  
22

23  
24 The differences between subcategories will be further described as incidence rate ratios by generalised  
25 linear modelling (Poisson or negative binomial, whichever is appropriate).  
26  
27

### 28 ***Best practice guidelines-based analyses***

29  
30  
31 In line with Objective 2 of this study, we will describe the extent to which pathology ordering  
32 practices among Australian GPs aligns with evidence-based pathology testing guidelines. Five initial  
33 candidate indicators have been identified for analyses.  
34  
35  
36

#### 37 **1) Monitoring patients on clozapine medication**

38  
39  
40 Rationale:

41  
42 Clozapine is a highly effective antipsychotic drug that is used for managing chronic schizophrenia.

43  
44 However, clozapine use can result in neutropenia in nearly two percent of patients, and  
45 agranulocytosis in one percent (14); warranting close monitoring of patients taking clozapine.

46  
47 Although clozapine is prescribed by specialists, monitoring is more frequently managed by GPs  
48 through shared-care arrangements (15). After 18 weeks of initiation and monitoring under a specialist,  
49 GPs can also prescribe clozapine. Australian guidelines recommend patients on clozapine medication  
50 have blood tests for white blood cell and neutrophil counts weekly for the first 18 weeks of initiation,  
51  
52  
53  
54  
55  
56  
57  
58  
59  
60

1  
2  
3 and monthly thereafter (16,17). Furthermore, a patient cannot obtain clozapine from the pharmacist  
4 without a recent blood test. Currently, the state of monitoring for patients on clozapine medication is  
5 not known.  
6  
7

#### 8 9 Analysis:

10  
11 The study population will be patients who are being prescribed clozapine by the GP (and therefore  
12 also needing to be monitored). The timeframe will include records after the first entry of the  
13 prescription into the EHR software, and before medication is discontinued (or patient is deceased or is  
14 no longer an active patient). The demographic characteristics of patients on clozapine medication as  
15 well as number of full blood counts for these patients will be described overall, by patient gender, age,  
16 and location, general practice size, and year of test. The number of full blood counts per patient per  
17 year will also be described, overall and by the demographic characteristics, by counting the number of  
18 full blood count tests conducted for each patient on clozapine medication for each available year.  
19 Subsequently, the median number of full blood count tests per patient per year will be calculated, with  
20 the inter-quartile range. For patients with more than one test, the time between tests will be  
21 determined. Subsequently, median time between tests will be calculated, with the inter-quartile range.  
22 As clozapine may also be prescribed by specialists, it may not be possible to determine when the  
23 medication was initiated through the EHR software. Consequently, it may not be possible to  
24 differentiate patients who require weekly tests from patients who require monthly tests. Nonetheless,  
25 it is expected patients on clozapine medication will have at least one full blood count test within  
26 approximately four to six weeks of a prior test; which will indicate compliance with guidelines.  
27  
28  
29  
30  
31  
32  
33  
34  
35  
36  
37  
38  
39  
40  
41  
42  
43

#### 44 **2) Measuring international normalised ratio (INR) levels for patients on warfarin medication**

##### 45 46 Rationale:

47  
48 Warfarin is a highly effective and widely-used anticoagulant in Australia. However, it is also one of  
49 the most common causes of prescribed medication-related mortality, due to its risk of causing  
50 bleeding (18). Best practice guidelines recommend that the initiation of warfarin medication should be  
51 accompanied by frequent International Normalised Ratio (INR) measurements until a stable  
52  
53  
54  
55  
56  
57  
58  
59  
60

1  
2  
3 therapeutic range is reached. After INR levels are stable, testing frequency should be once every four  
4  
5 to six weeks: unless a change (e.g. initiation of another medication) which can affect INR levels  
6  
7 occurs (19,20). Failure to correct INR levels is associated with increased mortality (21).

#### 8 9 Analysis:

10  
11 The sample population will be patients with a warfarin prescription. Only data entered after the first  
12  
13 instance the prescription is recorded in the GP's computer and before the patient permanently stops  
14  
15 the medication (or death) will be considered for analysis. As the pathology test frequency and repeat  
16  
17 interval requirements for patients treated with warfarin are similar to the requirements for clozapine,  
18  
19 similar reporting standards will be used. As with clozapine medication, it may not be possible to  
20  
21 differentiate patients who are initiating warfarin medication from those who have reached stable INR  
22  
23 levels. Despite this, based on best practice guidelines, it is expected that patients on warfarin  
24  
25 medication will have at least one INR measurement approximately within four weeks of a prior  
26  
27 measurement; which will be the criteria used to determine compliance with guidelines.

### 30 31 3) Glycated haemoglobin (HbA1c) testing for management of diabetic patients

#### 32 33 Rationale:

34  
35 It is estimated that over one million Australians are diagnosed with diabetes, 85% of whom have type  
36  
37 2 diabetes (22). Poor management of diabetes can lead to a range of complications, including  
38  
39 cardiovascular and renal diseases, and retinopathy (23). Best practice guidelines recommend recurrent  
40  
41 glycated haemoglobin (HbA1c) testing in at least half-yearly intervals for patients with diabetes (24).  
42  
43 HbA1c levels are a good indicator of long-term blood glucose control over the previous 8-12 weeks.  
44  
45 Uncontrolled glucose leading to high HbA1c levels may indicate increased risk of diabetes-related  
46  
47 complications. As such, under-testing may be associated with failure to identify complications.

#### 48 49 50 Analysis:

51  
52 The sample population will be patients diagnosed with type 2 diabetes. Only data after the diagnosis  
53  
54 being recorded and before death will be included. The analyses will be conducted and reported in a  
55  
56  
57  
58  
59  
60

1  
2  
3 similar structure as outlined previously for clozapine and warfarin medication pathology testing  
4  
5 guidelines. Based on the best practice guidelines, it is expected that a minimum of two HbA1c tests  
6  
7 will be conducted in a year for patients diagnosed with diabetes.

#### 8 9 **4) Frequency of vitamin D testing**

10  
11 Rationale:

12  
13  
14 A study on vitamin D testing found a considerable number of potentially unnecessary vitamin D tests  
15  
16 ordered by Australian GPs (25). This has led to changes in funding programs and the establishment of  
17  
18 guidelines, suggesting only patients at risk of complications that may arise due to low vitamin D  
19  
20 levels (e.g. pregnant women, older patients at risk of falls, patients with osteoporosis) should be tested  
21  
22 (26). Ultimately, an overall reduction of vitamin D tests was observed (9); however, studies on  
23  
24 whether the tests are being ordered according to the guidelines are limited (27).

25  
26  
27 Analysis:

28  
29  
30 To understand if vitamin D tests are being ordered according to guidelines, population and  
31  
32 demographic characteristics associated with higher vitamin D testing will be investigated. The sample  
33  
34 population will be all patients; from which patients who had a vitamin D test will be identified and  
35  
36 flagged (as the outcome variable). Univariate and multivariate logistic regression models will be fitted  
37  
38 to identify any variation in vitamin D testing by the demographic characteristics of patients,  
39  
40 diagnoses, and general practices. Differences will be reported as odds ratios and their 95% confidence  
41  
42 intervals. Descriptive characteristics (patient's gender, age, and location, general practice's size, and  
43  
44 year of test) of the sample population will also be described.

#### 45 46 **5) Thyroid Function Tests**

47  
48 Rationale:

49  
50  
51 Thyroid dysfunction can occur due to over- or under-function of the thyroid gland, and can lead to  
52  
53 cardiovascular diseases or subclinical hypothyroidism (remains asymptomatic) (28). Guidelines  
54  
55 recommend assessing thyroid dysfunction by initial thyroid-stimulating hormone (TSH) tests, which  
56  
57  
58  
59

1  
2  
3 may be followed up by free triiodothyronine (fT3) and free thyroxine (fT4) tests to assist with  
4 diagnosis if an abnormal TSH result is observed (29). Otherwise, fT3 and fT4 tests are not  
5 recommended without a prior TSH test. In Australia, there are currently no screening guidelines for  
6 when and how frequently TSH tests should be conducted among adults. The benefit of screening for  
7 thyroid disease, or even treating subclinical hypothyroidism, remains uncertain (30). It would be  
8 valuable to understand the demographics for and frequency of TSH test ordering by Australian GPs.  
9  
10  
11  
12  
13

#### 14 Analysis:

15  
16  
17 To describe thyroid function test use by Australian GPs, patients with TSH, fT3, and fT4 tests will be  
18 identified from the data. The associations with population characteristics and diagnoses in TSH, fT3,  
19 and fT4 testing will be investigated and reported by univariate and multivariate logistic regression  
20 models, similar to the reporting of vitamin D testing outlined previously. In addition to the population  
21 and general practice demographics, the odds of fT3 and fT4 testing by prior TSH test result, and  
22 normal/abnormal TSH test will also be analysed.  
23  
24  
25  
26  
27  
28  
29

30 The descriptive characteristics for TSH, fT3, and fT4 tests will be described overall, and by patient  
31 gender, age, and location, general practice size, and year of test. The number of fT3 and fT4 tests will  
32 be further described by TSH testing status: without a prior TSH test, simultaneously ordered with a  
33 TSH test, and following a reported TSH test. Where TSH test results are available, fT3 and fT4 tests  
34 following TSH testing will be further described by whether the initial TSH test was normal or  
35 abnormal.  
36  
37  
38  
39  
40  
41  
42

#### 43 **Sample size considerations**

44  
45 The study will be based on a dynamic cohort, with the number of practices, GPs, and patients  
46 expected to rise. Current estimates suggest that the study will have data from 350 general practices.  
47 Therefore, it is expected that there will be ample scope to detect significant variation in practices  
48 across patient and general practice demographic domains.  
49  
50  
51  
52  
53

#### 54 **DISCUSSION**

1  
2  
3 Pathology tests play an important role in general practice. There are guidelines outlining best practice  
4 for utilising tests, although the role of these guidelines in decision making is not well established.  
5

6  
7 A limitation of using electronic health records is that recording of clinical data is not always well-  
8 standardised, resulting in variation and inconsistencies in the information available (31). Issues may  
9 arise due to free-text data with no standard formatting, absence of recorded comorbidities and  
10 diagnoses or missing data (32), which are addressed by prioritising standardised terms and adopting  
11 stringent criteria to define variables. The POLAR program already codes and organises significant  
12 amounts of extracted data, and LOINC and SNOMED, both of which are available, provide  
13 standardised pathology tests and diagnoses. Another limitation of this study is that the study  
14 population will be drawn from only one region of Australia (Victoria), and the results may not be  
15 nationally representative.  
16  
17

18  
19 This research will help define the extent to which evidence-based best practice guidelines influence  
20 decision making in general practices. To date, difficulties in obtaining patient data from EHR  
21 softwares have hindered studying pathology test ordering in general practice. This study will be one  
22 of the first in Australia to extensively investigate the impact of best practice guidelines on GP testing  
23 patterns. The study can ultimately lead to better efficiency in pathology testing and improvements in  
24 patient outcomes by providing much needed information on the adherence of GPs to pathology testing  
25 guidelines.  
26  
27

### 28 29 30 31 32 33 34 35 36 37 38 39 40 **Ethics and Dissemination**

41  
42  
43 Ethics clearance to collect data from general practice facilities has been obtained by the data provider  
44 from the RACGP National Research and Evaluation Ethics Committee (NREEC 17-008). Approval  
45 for the research group to use these data has been obtained from Macquarie University (5201700872).  
46  
47 The data will be de-identified and reported at an aggregate level, and the results will neither identify  
48 GPs nor patients.  
49  
50

51  
52  
53 The results of this study will be reported to the Australian Government's Department of Health,  
54 disseminated in peer-reviewed academic journals, and presented in national and international  
55  
56  
57  
58  
59

1  
2  
3 conferences and industry forums. The involvement of the PHNs in the research process also allows  
4 for the research findings to inform their activities at an early stage, reducing the usual 'research into  
5 practice' delay.  
6  
7

### 8 9 **Contributors**

10  
11 This study is jointly undertaken through a collaboration between Centre for Health Systems and  
12 Safety Research at Macquarie University, the Royal College of Pathologists of Australasia Quality  
13 Assurance Programs, POLAR Data Space (Outcome Health, Eastern Melbourne PHN, Gippsland  
14 PHN and South Eastern Melbourne PHN). AG initiated the project and led the development of the  
15 Quality Use of Pathology Program (QUPP) grant proposal. AG, JIW, LL, LP, TB, CP, and NR are  
16 chief investigators on the project and have contributed to the grant proposal and protocol in their area  
17 of expertise. From the PHNs, MS, RW, and ED contributed their expertise in general practice to the  
18 protocol. AM, from Outcome Health, has contributed his expertise in EHR data to the protocol. RAH,  
19 GS, and GSF are members of the project team and contributed to the protocol in relation to describing  
20 the procedures of data collection, validation, and analyses procedures. RAH and GS prepared the first  
21 draft of this protocol based on the grant proposal. All authors have reviewed and approved the final  
22 version of this protocol.  
23  
24  
25  
26  
27  
28  
29  
30  
31  
32  
33  
34  
35

### 36 **Funding**

37  
38 This study is independently executed through funding by a grant from the Australian Government  
39 Department of Health, Quality Use of Pathology Program (Agreement ID: 4-2QFVW4M). This  
40 Australian national grants program aims to improve health and economic outcomes from pathology  
41 tests.  
42  
43  
44  
45  
46

### 47 **Competing Interests**

48  
49 None declared.  
50  
51

### 52 **REFERENCES**

53  
54  
55  
56  
57  
58  
59  
60

1. Harris MF, Jayasinghe UW, Taggart JR, Christl B, Proudfoot JG, Crookes PA, et al. Multidisciplinary Team Care Arrangements in the management of patients with chronic disease in Australian general practice. *Med J Aust.* 2011;194(5):236–239.
2. Britt H, Miller G, Bayram C, Henderson J, Valenti L, Harrison C, et al. A decade of Australian general practice activity 2006-07 to 2015-16: BEACH : bettering the evaluation and care of health. 2016.
3. Zhi M, Ding EL, Theisen-Toupal J, Whelan J, Arnaout R. The Landscape of Inappropriate Laboratory Testing: A 15-Year Meta-Analysis. *PLOS ONE.* 2013 Nov 15;8(11):e78962.
4. Elshaug AG, Watt AM, Mundy L, Willis CD. Over 150 potentially low-value health care practices: an Australian study. *Med J Aust.* 2012 Nov 19;197(10):556–60.
5. Bhatia RS, Levinson W, Shortt S, Pendrith C, Fric-Shamji E, Kallewaard M, et al. Measuring the effect of Choosing Wisely: an integrated framework to assess campaign impact on low-value care. *BMJ Qual Saf.* 2015 Aug;24(8):523–31.
6. National Institute for Health and Care Excellence: Clinical Guidelines [Internet]. [accessed 2018 Mar 26]. Available from: [www.nice.org.uk](http://www.nice.org.uk)
7. RACGP - Redbook Guidelines for preventive activities in general practice 9th edition [Internet]. [accessed 2018 Mar 26]. Available from: <https://www.racgp.org.au/redbook>
8. What Physicians Say about the Problem, the Causes, and the Solutions: Results from a National Survey of Physicians [Internet]. PerryUndem Research/Communication; 2014 May [accessed 2018 Mar 26]. (Unnecessary Tests and Procedures In the Health Care System). Available from: <http://www.choosingwisely.org/wp-content/uploads/2015/04/Final-Choosing-Wisely-Survey-report.pdf>
9. Boyages SC. Vitamin D testing: new targeted guidelines stem the overtesting tide. *Med J Aust.* 2016 Jan 18;204(1):18.
10. Pearce C, Shearer M, Gardner K, Kelly J. A division's worth of data. *Aust Fam Physician.* 2011 Mar;40(3):167–70.
11. MedicineInsight. MedicineInsight Data Book version 1.1. [Internet]. NPS MedicineWise. [accessed 2018 Mar 26]. Available from: [https://cdn0.scrvt.com/08ab3606b0b7a8ea53fd0b40b1c44f86/475dedf8d41a8a72/88fd0674e192/MedicineInsight-Data-Book-and-Dictionary\\_v1.1.pdf](https://cdn0.scrvt.com/08ab3606b0b7a8ea53fd0b40b1c44f86/475dedf8d41a8a72/88fd0674e192/MedicineInsight-Data-Book-and-Dictionary_v1.1.pdf)
12. Gadzhanova S, Pratt N, Roughead E. Use of SGLT2 inhibitors for diabetes and risk of infection: Analysis using general practice records from the NPS MedicineWise MedicineInsight program. *Diabetes Res Clin Pract.* 2017 Aug;130:180–5.
13. Vandembroucke JP, Elm E von, Altman DG, Gøtzsche PC, Mulrow CD, Pocock SJ, et al. Strengthening the Reporting of Observational Studies in Epidemiology (STROBE): Explanation and Elaboration. *PLOS Med.* 2007 Oct 16;4(10):e297.
14. Gerson SL. Clozapine - deciphering the risks. *N Engl J Med.* 1993 Jul 15;329(3):204–5.



15. Filia SL, Wheelhouse A, Lee SJ, Main M, de Castella A, Wilkins S, et al. Transitioning patients taking clozapine from the public to private/GP shared-care setting: barriers and criteria. *Aust N Z J Psychiatry*. 2012 Mar;46(3):225–31.
16. Clozapine Management Clinical Guideline [Internet]. [accessed 2018 Mar 26]. Available from: [http://www.sahealth.sa.gov.au/wps/wcm/connect/059961804298b3078c77be80c298878e/Clozapine+Management+Clinical+Guideline\\_13092017.pdf?MOD=AJPERES&CACHEID=059961804298b3078c77be80c298878e](http://www.sahealth.sa.gov.au/wps/wcm/connect/059961804298b3078c77be80c298878e/Clozapine+Management+Clinical+Guideline_13092017.pdf?MOD=AJPERES&CACHEID=059961804298b3078c77be80c298878e)
17. Safe and quality use of clozapine therapy in mental health services [Internet]. State of Queensland. [accessed 2018 March 26]. Available from: [https://www.health.qld.gov.au/\\_\\_data/assets/pdf\\_file/0025/625354/qh-gdl-437.pdf](https://www.health.qld.gov.au/__data/assets/pdf_file/0025/625354/qh-gdl-437.pdf)
18. Wysowski DK, Nourjah P, Swartz L. Bleeding complications with warfarin use: a prevalent adverse effect resulting in regulatory action. *Arch Intern Med*. 2007 Jul 9;167(13):1414–9.
19. Tideman PA, Tirimacco R, St John A, Roberts GW. How to manage warfarin therapy. *Aust Prescr*. 2015 Apr;38(2):44–8.
20. Guidelines for warfarin management in the community [Internet]. State of Queensland. [accessed 2018 March 26]. Available from: <https://www.health.qld.gov.au/clinical-practice/guidelines-procedures/medicines?a=165945>
21. Menzin J., Hoesche J., Friedman M., Nichols C., Bergman G. E., Crowther M., et al. Failure to correct International Normalized Ratio and mortality among patients with warfarin-related major bleeding: an analysis of electronic health records. *J Thromb Haemost*. 2012 Mar 30;10(4):596–605.
22. Australian Government Department of Health. National Strategic Framework for Chronic Conditions [Internet]. [accessed 2018 Mar 26]. Available from: <http://www.health.gov.au/internet/main/publishing.nsf/content/nsfcc>
23. Choby B. Diabetes Update: Prevention and Management of Diabetes Complications. *FP Essent*. 2017 May;456:36–40.
24. The Royal Australian College of General Practitioners (RACGP) - General practice management of type 2 diabetes [Internet]. [accessed 2018 Mar 26]. Available from: <https://www.racgp.org.au/your-practice/guidelines/diabetes/>
25. Bilinski K, Boyages S. Evidence of overtesting for vitamin D in Australia: an analysis of 4.5 years of Medicare Benefits Schedule (MBS) data. *BMJ Open*. 2013 Jan 1;3(6):e002955.
26. Position Statement: Use and Interpretation of Vitamin D testing [Internet]. The Royal College of Pathologists of Australia (RCPA). [accessed 2018 Mar 26]. Available from: <https://www.rcpa.edu.au/Library/College-Policies/Position-Statements/Use-and-Interpretation-of-Vitamin-D-Testing>
27. Gowda U, Smith BJ, Wluka AE, Fong DP, Kaur A, Renzaho AM. Vitamin D testing patterns among general practitioners in a major Victorian primary health care service. *Aust N Z J Public Health*. 2015 Aug 10;40(2):144–7.

- 1
- 2
- 3 28. Surks MI, Ortiz E, Daniels GH, Sawin CT, Col NF, Cobin RH, et al. Subclinical thyroid disease:  
4 scientific review and guidelines for diagnosis and management. JAMA. 2004 Jan  
5 14;291(2):228–38.
- 6
- 7 29. Walsh JP. Managing thyroid disease in general practice. Med J Aust. 2016 Aug 15;205(4):179–  
8 84.
- 9
- 10 30. Ladenson PW, Singer PA, Ain KB, Bagchi N, Bigos ST, Levy EG, et al. American Thyroid  
11 Association guidelines for detection of thyroid dysfunction. Arch Intern Med. 2000 Jun  
12 12;160(11):1573–5.
- 13
- 14 31. Liaw S-T, Taggart J, Yu H, de Lusignan S. Data extraction from electronic health records -  
15 existing tools may be unreliable and potentially unsafe. Aust Fam Physician. 2013  
16 Nov;42(11):820–3.
- 17
- 18 32. Young J, Eley D, Fahey P, Patterson E, Hegney D. Enabling research in general practice--  
19 increasing functionality of electronic medical records. Aust Fam Physician. 2010 Jul;39(7):506–  
20 9.
- 21
- 22
- 23
- 24
- 25
- 26
- 27
- 28
- 29
- 30
- 31
- 32
- 33
- 34
- 35
- 36
- 37
- 38
- 39
- 40
- 41
- 42
- 43
- 44
- 45
- 46
- 47
- 48
- 49
- 50
- 51
- 52
- 53
- 54
- 55
- 56
- 57
- 58
- 59
- 60

# BMJ Open

## Compliance with pathology testing guidelines in Australian general practice: protocol for a secondary analysis of electronic health record data

|                                 |                                                                                                                                                                                                                                                                                                                                                                                                                                                                                                                                                                                                                                                                                                                                                                                                                                                                                                                                                                                                                                                                                                                                                                                                                                                                                                                                                                                                                                                                                                                                                                  |
|---------------------------------|------------------------------------------------------------------------------------------------------------------------------------------------------------------------------------------------------------------------------------------------------------------------------------------------------------------------------------------------------------------------------------------------------------------------------------------------------------------------------------------------------------------------------------------------------------------------------------------------------------------------------------------------------------------------------------------------------------------------------------------------------------------------------------------------------------------------------------------------------------------------------------------------------------------------------------------------------------------------------------------------------------------------------------------------------------------------------------------------------------------------------------------------------------------------------------------------------------------------------------------------------------------------------------------------------------------------------------------------------------------------------------------------------------------------------------------------------------------------------------------------------------------------------------------------------------------|
| Journal:                        | <i>BMJ Open</i>                                                                                                                                                                                                                                                                                                                                                                                                                                                                                                                                                                                                                                                                                                                                                                                                                                                                                                                                                                                                                                                                                                                                                                                                                                                                                                                                                                                                                                                                                                                                                  |
| Manuscript ID                   | bmjopen-2018-024223.R1                                                                                                                                                                                                                                                                                                                                                                                                                                                                                                                                                                                                                                                                                                                                                                                                                                                                                                                                                                                                                                                                                                                                                                                                                                                                                                                                                                                                                                                                                                                                           |
| Article Type:                   | Protocol                                                                                                                                                                                                                                                                                                                                                                                                                                                                                                                                                                                                                                                                                                                                                                                                                                                                                                                                                                                                                                                                                                                                                                                                                                                                                                                                                                                                                                                                                                                                                         |
| Date Submitted by the Author:   | 26-Jul-2018                                                                                                                                                                                                                                                                                                                                                                                                                                                                                                                                                                                                                                                                                                                                                                                                                                                                                                                                                                                                                                                                                                                                                                                                                                                                                                                                                                                                                                                                                                                                                      |
| Complete List of Authors:       | Sezgin, Gorkem; Macquarie University Faculty of Medicine and Health Sciences, Centre for Health Systems and Safety Research, Australian Institute of Health Innovation<br>Georgiou, A; Macquarie University, Australian Institute of Health Innovation<br>Hardie, Rae-Anne; Macquarie University Faculty of Medicine and Health Sciences, Centre for Health Systems and Safety Research, Australian Institute of Health Innovation<br>Li, Ling; Macquarie University Faculty of Medicine and Health Sciences, Centre for Health Systems and Safety Research, Australian Institute of Health Innovation<br>Pont, Lisa; University of Technology Sydney Faculty of Health; Macquarie University Faculty of Medicine and Health Sciences, Centre for Health Systems and Safety Research, Australian Institute of Health Innovation<br>Badrick, Tony; Royal College of Pathologists of Australasia, QAP<br>Franco, Guilherme; Macquarie University Faculty of Medicine and Health Sciences, Centre for Health Systems and Safety Research, Australian Institute of Health Innovation<br>Westbrook, Johanna; Macquarie University Faculty of Medicine and Health Sciences, Centre for Health Systems and Safety Research, Australian Institute of Health Innovation<br>Rinehart, Natalie; Outcome Health<br>McLeod, Adam; Outcome Health<br>Pearce, Christopher; Outcome Health<br>Shearer, Marianne; Gippsland Primary Health Network<br>Whyte, Robin; Eastern Melbourne Primary Health Network<br>Deveny, Elizabeth; South Eastern Melbourne Primary Health Network |
| <b>Primary Subject Heading</b>: | General practice / Family practice                                                                                                                                                                                                                                                                                                                                                                                                                                                                                                                                                                                                                                                                                                                                                                                                                                                                                                                                                                                                                                                                                                                                                                                                                                                                                                                                                                                                                                                                                                                               |
| Secondary Subject Heading:      | Evidence based practice, Pathology                                                                                                                                                                                                                                                                                                                                                                                                                                                                                                                                                                                                                                                                                                                                                                                                                                                                                                                                                                                                                                                                                                                                                                                                                                                                                                                                                                                                                                                                                                                               |
| Keywords:                       | Protocols & guidelines < HEALTH SERVICES ADMINISTRATION & MANAGEMENT, Quality in health care < HEALTH SERVICES ADMINISTRATION & MANAGEMENT, Health informatics < BIOTECHNOLOGY & BIOINFORMATICS, PATHOLOGY, PRIMARY CARE, Australia                                                                                                                                                                                                                                                                                                                                                                                                                                                                                                                                                                                                                                                                                                                                                                                                                                                                                                                                                                                                                                                                                                                                                                                                                                                                                                                              |
|                                 |                                                                                                                                                                                                                                                                                                                                                                                                                                                                                                                                                                                                                                                                                                                                                                                                                                                                                                                                                                                                                                                                                                                                                                                                                                                                                                                                                                                                                                                                                                                                                                  |

1  
2  
3  
4  
5  
6  
7  
8  
9  
10  
11  
12  
13  
14  
15  
16  
17  
18  
19  
20  
21  
22  
23  
24  
25  
26  
27  
28  
29  
30  
31  
32  
33  
34  
35  
36  
37  
38  
39  
40  
41  
42  
43  
44  
45  
46  
47  
48  
49  
50  
51  
52  
53  
54  
55  
56  
57  
58  
59  
60

SCHOLARONE™  
Manuscripts

For peer review only

1  
2  
3 **Compliance with pathology testing guidelines in Australian general practice: protocol for a**  
4 **secondary analysis of electronic health record data**

5  
6 Authors:

7 Gorkem Sezgin<sup>1</sup>, gorkem.sezgin@mq.edu.au, +61 2 9850 2490

8  
9 Georgiou, Andrew<sup>1</sup>

10  
11 Hardie, Rae-Anne<sup>1</sup>

12  
13 Li, Ling<sup>1</sup>

14  
15 Pont, Lisa G.<sup>1,2</sup>

16  
17 Badrick, Tony<sup>3</sup>

18  
19 Franco, Guilherme S.<sup>1</sup>

20  
21 Westbrook, Johanna I.<sup>1</sup>

22  
23 Rinehart, Natalie<sup>4</sup>

24  
25 McLeod, Adam<sup>4</sup>

26  
27 Pearce, Chris<sup>4</sup>

28  
29 Shearer, Marianne<sup>5</sup>

30  
31 Whyte, Robin<sup>6</sup>

32  
33 Deveny, Elizabeth<sup>7</sup>

34 1 Centre for Health Systems and Safety Research, Australian Institute of Health Innovation,  
35 Macquarie University, Level 6, 75 Talavera Road, Macquarie University, NSW 2109, Australia

36  
37 2 Graduate School of Health, University of Technology Sydney, NSW 2007, Australia

38  
39 3 The Royal College of Pathologists of Australasia Quality Assurance Program, St Leonards, NSW  
40 2065, Australia

41  
42 4 Outcome Health, Burwood, VIC 3125, Australia

43  
44 5 Gippsland Primary Health Network, Moe, VIC 3825, Australia

45  
46 6 Eastern Melbourne Primary Health Network, Box Hill, VIC 3128, Australia

47  
48 7 South Eastern Melbourne Primary Health Network, Heatherton, VIC 3202, Australia

1  
2  
3 **Pathology testing in Australian general practice and compliance with guideline**  
4 **recommendations: A study protocol for a secondary analysis of electronic health record data**  
5

6 **ABSTRACT**

7 **Introduction** In Australia, general practitioners usually provide the first point of contact for patients  
8 with non-urgent medical conditions. Appropriate and efficient utilisation of pathology tests by general  
9 practitioners forms a key part of diagnosis and monitoring. However over- and under- utilisation of  
10 pathology tests have been reported across several tests and conditions, despite evidence-based  
11 guidelines outlining best practice in pathology testing. There are a limited number of studies  
12 evaluating the impact of these guidelines on pathology testing in general practice. The aim of our  
13 quantitative observational study is to define how pathology tests are used in general practice and  
14 investigate how test ordering practices align with evidence-based pathology guidelines.  
15  
16

17 **Methods and analysis** Access to non-identifiable patient data will be obtained through electronic  
18 health records from general practices across three primary health networks in Victoria, Australia.  
19 Numbers and characteristics of patients, general practices, encounters, pathology tests, and problems  
20 managed over time will be described. Overall rates of encounters and tests, alongside more detailed  
21 investigation between subcategories (encounter year, patient's age, gender, and location, and general  
22 practice size) will also be undertaken. To evaluate how general practitioner test ordering coincides  
23 with evidence-based guidelines, five key candidate indicators will be investigated: full blood counts  
24 for patients on clozapine medication; international normalised ratio (INR) measurements for patients  
25 on warfarin medication; glycated haemoglobin (HbA1c) testing for monitoring diabetes; vitamin D  
26 testing; and thyroid function testing.  
27  
28

29 **Ethics and dissemination** Ethics clearance to collect data from general practice facilities has been  
30 obtained by the data provider from the RACGP National Research and Evaluation Ethics Committee  
31 (NREEC 17-008). Approval for the research group to use these data has been obtained from  
32 Macquarie University (5201700872). This study is funded by the Australian Government Department  
33 of Health Quality Use of Pathology Program (Agreement ID: 4-2QFVW4M). Findings will be  
34 reported to the Department of Health and disseminated in peer-reviewed academic journals and  
35 presentations (national and international conferences, industry forums).  
36  
37

38 **STRENGTHS AND LIMITATIONS OF THIS STUDY**

- 39
- 40 • The study population will be drawn from a large region in Victoria, Australia, and is expected  
41 to contain a large sample population (data from approximately 350 general practices), along  
42 with a large number of demographic variables (e.g., region, gender, age).
  - 43 • Electronic health records contain a vast amount of information on patients, allowing us to  
44 control for potential interacting or predictive variables on patient outcomes using statistical  
45 modelling.
  - 46 • Some electronic health record fields may not be completely standardised across practices and  
47 could contain inconsistencies and missing information; which may limit the volume of data  
48 that can be extracted and analysed.
  - 49 • Some medications being investigated in this study may be prescribed and/or monitored by  
50 specialists, which may result in cases being missed.  
51  
52  
53  
54  
55  
56  
57  
58  
59  
60

## INTRODUCTION

In Australia, general practitioners (GPs) are usually the first point of contact for patients with non-emergency health problems. They play an important role in the early detection, prevention (including shared-care arrangements) and treatment of disease (1). Pathology tests are a key part of general practice assisting GPs in diagnosing, screening, treating, and monitoring diseases. The past decade has seen an increase in both visits to and problems managed by GPs in Australia, resulting in an estimated 24.2 million additional pathology tests being ordered in 2015-2016 compared to 2006-2007 (2).

Appropriate and timely utilisation of pathology tests can improve the quality and outcome of patient care. However, both over- and under- utilisation of pathology tests have been frequently observed in a range of clinical scenarios (3,4). Several guidelines have been established to encourage better utilisation of pathology tests among GPs across Australia, the US, Canada, and the UK. These include initiatives such as *Choosing Wisely* (5), *National Institute for Health and Clinical Excellence (NICE)* (6), and *Royal Australian College of General Practitioners (RACGP) Guidelines for preventative activities in general practice* (7). Currently, there is little evidence on how test ordering practices by GPs align with these recommendations and guidelines in Australia, and elsewhere. A survey of 600 US doctors revealed only 21% of doctors were familiar with the *Choosing Wisely* campaign. However doctors aware of the campaign had a lower proportion of unnecessary pathology testing (8). In Australia, increased awareness of best-practice in vitamin D test ordering is reported to have contributed to a reduction in healthcare costs and potentially unnecessary tests (9). Considering the importance of pathology testing for managing diseases, a better understanding of how pathology testing by GPs coincides with evidence-based guidelines will be invaluable for the success of management and disease-prevention strategies.

Until recently, the survey-based *Bettering the Evaluation and Care of Health (BEACH)* study provided the most comprehensive data on Australian GP activity (2). However, its cross-sectional design prevented it from reporting longitudinal patient level changes and outcomes. The BEACH study was discontinued in 2016, and has since left a gap in our understanding of GP activity; particularly in relation to pathology test ordering. The extensive use of computers by Australian GPs has prompted interest in the use of electronic health record (EHR) data as a research source for monitoring the quality of GP services, and has led to research and publications based on EHR data (10). The Australian Department of Health funded NPS Medicinewise MedicinesInsight dataset contains a national collection of electronic health records (EHRs) from 650 practices covering over 3,300 GPs and nearly 3.6 million active patients (11). This dataset has been used in several population health research projects, and has demonstrated the value of EHR data in research (12). This study will use EHR data from the POLAR Data Space, containing de-identified data from consenting general practices collected on behalf of Australian PHNs from approximately 350 practices. POLAR Data Space has added measures to ensure robust and accurate data, and implements standardised terminologies to make the data more approachable for research use. This study, undertaken in collaboration with POLAR Data Space Research Consortia and its associated Primary Health Networks (PHNs), will facilitate a comprehensive analyses of general practice activity and its relationship to pathology testing in Australia through EHR data.

### Objectives:

The objectives of this study are to:

- 1
- 2
- 3 1. Describe general practice activity and characteristics of pathology test ordering based on
- 4 electronic health record data;
- 5 2. Investigate compliance with evidence-based guidelines to determine the appropriateness and
- 6 quality use of pathology in general practice.
- 7

## 8 **METHODS AND ANALYSES**

### 9

#### 10 **Study design**

11 A retrospective observational study of Australian general practice health records and pathology  
12 testing data. The study will run for a period of approximately two years spanning from early 2018 to  
13 late 2019.  
14

#### 15 **Data source**

16 Data to be used in this study will be provided by the POLAR Data Space (10). POLAR Data Space  
17 collects de-identified data from consenting general practices on behalf of Australian PHNs: including  
18 Gippsland, Eastern Melbourne, and South Eastern Melbourne PHNs. Data are extracted from  
19 approximately 350 practices in urban and rural regions in Victoria, Australia. The primary purpose of  
20 the data collection is to provide information to improve patient care at the practice level and  
21 population health initiatives at the PHN level. POLAR Data Space has ethics approval for the  
22 collection, storage and de-identification of the data which it makes available for approved research  
23 governed by the involved PHNs.  
24

25 The data source will include pooled general practice patient data extracted from Best Practice,  
26 Medical Director, and Zedmed EHRs. Data will include de-identified demographic information about  
27 patients and general practices, as well as visit records (diagnosis, past history, medications) and  
28 pathology test records (test name and result). Both historical and current information about patients  
29 will be acquired, providing a longitudinal record. It is expected that the data will span a period of over  
30 a decade, from early 2000's to early 2018.  
31

#### 32 **Study Population**

33 The study population will consist of all patients who visited any of the general practices included in  
34 the study, and had their visit recorded in the practices' EHR software.  
35

#### 36 **Variables**

37 The following criteria will be adopted to accurately describe general practice activity and ensure data  
38 quality: (i) A patient will be distinguished by a unique (non-identifiable) patient code recorded within  
39 a general practice and included if determined to be an active patient (i.e. has visited the GP three or  
40 more times in the past two years, not deceased); (ii) An encounter (i.e. consultation, visit) will be  
41 defined as a patient visit recorded by a doctor or nurse during which an action (e.g. consultation,  
42 prescription) is performed, and will be identified through a variable indicating the visit type (e.g.  
43 surgery, administrative, phone call); (iii) A pathology test will be defined as either a panel of  
44 interrelated tests (e.g. full blood count) or an individual test (e.g. troponin test); (iv) Where possible,  
45 standardised records such as Logical Observation Identifiers Names and Codes (LOINC) and  
46 Systematized Nomenclature of Medicine (SNOMED) terminologies will be prioritised to identify  
47 variables; otherwise, free-text data will be searched for terms of interest (e.g. "diabetes" or its  
48 abbreviated forms in the diagnosis field, excluding "not diabetes").  
49

#### 50 **Analyses**

### 51

### 52

### 53

### 54

### 55

### 56

### 57

### 58

### 59

### 60



1  
2  
3 Data examination and analysis will be performed using Stata/MP 15.1 (StataCorp, College Station,  
4 Texas, USA). The methods outlined in this protocol are structured according to the *Strengthening the*  
5 *Reporting of Observational Studies in Epidemiology* (STROBE) checklist of items to be included in  
6 observational studies (13).  
7

### 8 ***Characteristics of general practice activity and pathology testing***

9  
10 In line with Objective 1 of this study, we will analyse and describe Australian general practice  
11 characteristics and activity. These characteristics can subsequently be compared to reports on national  
12 demographics and healthcare statistics, such as *Australian Institute of Health and Welfare's* (AIHW)  
13 annual reports.  
14

15 Sample population characteristics will be reported. This will include describing the characteristics of  
16 patients, general practices, encounters, tests, and problems managed across time. Subsequent analyses  
17 will describe overall median rates of encounters and tests, alongside more detailed investigation  
18 between subcategories (encounter year, patient's age, gender, and postcode, and number of active  
19 general practitioners in practice) using the following indicators: encounters per patient per year, and  
20 tests per encounter.  
21

22 The differences between subcategories will be further described as incidence rate ratios by generalised  
23 linear modelling (Poisson or negative binomial, whichever is appropriate).  
24

### 25 ***Best practice guidelines-based analyses***

26  
27 In line with Objective 2 of this study, we will describe the extent to which pathology ordering  
28 practices among Australian GPs aligns with evidence-based pathology testing guidelines. Five initial  
29 candidate indicators have been identified for analyses.  
30

#### 31 **1) Monitoring patients on clozapine medication**

32  
33 Rationale:

34 Clozapine is a highly effective antipsychotic drug that is used for managing chronic schizophrenia.  
35 However, clozapine use can result in neutropenia in nearly two percent of patients, and  
36 agranulocytosis in one percent (14); warranting close monitoring of patients taking clozapine.  
37 Although clozapine is prescribed by specialists, monitoring is more frequently managed by GPs  
38 through shared-care arrangements (15). After 18 weeks of initiation and monitoring under a specialist,  
39 GPs can also prescribe clozapine. Australian guidelines recommend patients on clozapine medication  
40 have blood tests for white blood cell and neutrophil counts weekly for the first 18 weeks of initiation,  
41 and monthly thereafter (16,17). Furthermore, a patient cannot obtain clozapine from the pharmacist  
42 without a recent blood test. Currently, the state of monitoring for patients on clozapine medication is  
43 not known.  
44  
45

46  
47 Analysis:

48 The study population will be patients who are being prescribed clozapine by the GP (and therefore  
49 also needing to be monitored). The timeframe will include records after the first entry of the  
50 prescription into the EHR software, and before medication is discontinued (or patient is deceased or is  
51 no longer an active patient). The demographic characteristics of patients on clozapine medication as  
52 well as number of full blood counts for these patients will be described overall, by patient gender, age,  
53 and location, general practice size, and year of test. The number of full blood counts per patient per  
54 year will also be described, overall and by the demographic characteristics, by counting the number of  
55 full blood count tests conducted for each patient on clozapine medication for each available year.  
56  
57  
58  
59

1  
2  
3 Subsequently, the median number of full blood count tests per patient per year will be calculated, with  
4 the inter-quartile range. For patients with more than one test, the time between tests will be  
5 determined. Subsequently, median time between tests will be calculated, with the inter-quartile range.  
6 As clozapine may also be prescribed by specialists, it may not be possible to determine when the  
7 medication was initiated through the EHR software. Consequently, it may not be possible to  
8 differentiate patients who require weekly tests from patients who require monthly tests. Nonetheless,  
9 it is expected patients on clozapine medication will have at least one full blood count test within  
10 approximately four to six weeks of a prior test; which will indicate compliance with guidelines.  
11

## 12 **2) Measuring international normalised ratio (INR) levels for patients on warfarin medication**

13  
14 Rationale:

15  
16 Warfarin is a highly effective and widely-used anticoagulant in Australia. However, it is also one of  
17 the most common causes of prescribed medication-related mortality, due to its risk of causing  
18 bleeding (18). Best practice guidelines recommend that the initiation of warfarin medication should be  
19 accompanied by frequent International Normalised Ratio (INR) measurements until a stable  
20 therapeutic range is reached. After INR levels are stable, testing frequency should be once every four  
21 to six weeks: unless a change (e.g. initiation of another medication) which can affect INR levels  
22 occurs (19,20). Failure to correct INR levels is associated with increased mortality (21).  
23

24  
25 Analysis:

26  
27 The sample population will be patients with a warfarin prescription. Only data entered after the first  
28 instance the prescription is recorded in the GP's computer and before the patient permanently stops  
29 the medication (or death) will be considered for analysis. As the pathology test frequency and repeat  
30 interval requirements for patients treated with warfarin are similar to the requirements for clozapine,  
31 similar reporting standards will be used. As with clozapine medication, it may not be possible to  
32 differentiate patients who are initiating warfarin medication from those who have reached stable INR  
33 levels. Despite this, based on best practice guidelines, it is expected that patients on warfarin  
34 medication will have at least one INR measurement approximately within four weeks of a prior  
35 measurement; which will be the criteria used to determine compliance with guidelines.  
36

## 37 **3) Glycated haemoglobin (HbA1c) testing for management of diabetic patients**

38  
39 Rationale:

40  
41 It is estimated that over one million Australians are diagnosed with diabetes, 85% of whom have type  
42 2 diabetes (22). Poor management of diabetes can lead to a range of complications, including  
43 cardiovascular and renal diseases, and retinopathy (23). Best practice guidelines recommend recurrent  
44 glycated haemoglobin (HbA1c) testing in at least half-yearly intervals for patients with diabetes (24).  
45 HbA1c levels are a good indicator of long-term blood glucose control over the previous 8-12 weeks.  
46 Uncontrolled glucose leading to high HbA1c levels may indicate increased risk of diabetes-related  
47 complications. As such, under-testing may be associated with failure to identify complications.  
48

49  
50 Analysis:

51  
52 The sample population will be patients diagnosed with type 2 diabetes. Only data after the diagnosis  
53 being recorded and before death will be included. The analyses will be conducted and reported in a  
54 similar structure as outlined previously for clozapine and warfarin medication pathology testing  
55 guidelines. Based on the best practice guidelines, it is expected that a minimum of two HbA1c tests  
56 will be conducted in a year for patients diagnosed with diabetes.  
57  
58  
59  
60

#### 4) Frequency of vitamin D testing

##### Rationale:

A study on vitamin D testing found a considerable number of potentially unnecessary vitamin D tests ordered by Australian GPs (25). This has led to changes in funding programs and the establishment of guidelines, suggesting only patients at risk of complications that may arise due to low vitamin D levels (e.g. pregnant women, older patients at risk of falls, patients with osteoporosis) should be tested (26). Ultimately, an overall reduction of vitamin D tests was observed (9); however, studies on whether the tests are being ordered according to the guidelines are limited (27).

##### Analysis:

To understand if vitamin D tests are being ordered according to guidelines, population and demographic characteristics associated with higher vitamin D testing will be investigated. The sample population will be all patients; from which patients who had a vitamin D test will be identified and flagged (as the outcome variable). Univariate and multivariate logistic regression models will be fitted to identify any variation in vitamin D testing by the demographic characteristics of patients, diagnoses, and general practices. Differences will be reported as odds ratios and their 95% confidence intervals. Descriptive characteristics (patient's gender, age, and location, general practice's size, and year of test) of the sample population will also be described. To obtain an understanding of the reasons for vitamin D testing, other tests ordered simultaneously will be identified and examined, as well as preceding medication prescriptions and diagnoses.

#### 5) Thyroid Function Tests

##### Rationale:

Thyroid dysfunction can occur due to over- or under-function of the thyroid gland, and can lead to cardiovascular diseases or subclinical hypothyroidism (remains asymptomatic) (28). Guidelines recommend assessing thyroid dysfunction by initial thyroid-stimulating hormone (TSH) tests, which may be followed up by free triiodothyronine (fT3) and free thyroxine (fT4) tests to assist with diagnosis if an abnormal TSH result is observed (29). Otherwise, fT3 and fT4 tests are not recommended without a prior TSH test. In Australia, there are currently no screening guidelines for when and how frequently TSH tests should be conducted among adults. The benefit of screening for thyroid disease, or even treating subclinical hypothyroidism, remains uncertain (30). It would be valuable to understand the demographics for and frequency of TSH test ordering by Australian GPs.

##### Analysis:

To describe thyroid function test use by Australian GPs, patients with TSH, fT3, and fT4 tests will be identified from the data. The associations with population characteristics and diagnoses in TSH, fT3, and fT4 testing will be investigated and reported by univariate and multivariate logistic regression models, similar to the reporting of vitamin D testing outlined previously. In addition to the population and general practice demographics, the odds of fT3 and fT4 testing by prior TSH test result, and normal/abnormal TSH test will also be analysed.

The descriptive characteristics for TSH, fT3, and fT4 tests will be described overall, and by patient gender, age, and location, general practice size, and year of test. The number of fT3 and fT4 tests will be further described by TSH testing status: without a prior TSH test, simultaneously ordered with a TSH test, and following a reported TSH test. Where TSH test results are available, fT3 and fT4 tests

1  
2  
3 following TSH testing will be further described by whether the initial TSH test was normal or  
4 abnormal.

### 5 6 **Sample size considerations**

7 The study will be based on a dynamic cohort, with the number of practices, GPs, and patients  
8 expected to rise. Current estimates suggest that the study will have data from 350 general practices.  
9 Therefore, it is expected that there will be ample scope to detect significant variation in practices  
10 across patient and general practice demographic domains.  
11

### 12 13 **Patient and Public Involvement**

14 There was no involvement of patients or the public in this study.  
15  
16  
17

## 18 **DISCUSSION**

19 Pathology tests play an important role in general practice. There are guidelines outlining best practice  
20 for utilising tests, although the role of these guidelines in decision making is not well established.  
21

22 A limitation of using electronic health records is that recording of clinical data is not always well-  
23 standardised, resulting in variation and inconsistencies in the information available (31). Issues may  
24 arise due to free-text data with no standard formatting, absence of recorded comorbidities and  
25 diagnoses or missing data (32), which are addressed by prioritising standardised terms and adopting  
26 stringent criteria to define variables. The POLAR program already codes and organises significant  
27 amounts of extracted data, and LOINC and SNOMED, both of which are available, provide  
28 standardised pathology tests and diagnoses. Another limitation of this study is that the study  
29 population will be drawn from only one region of Australia (Victoria), and the results may not be  
30 nationally representative. One other limitation is related to the indicators being measured.  
31 Medications, such as clozapine and warfarin are generally prescribed by specialists, whom might also  
32 continually monitor the patient's status. In such cases, observed compliance with guidelines in general  
33 practice may be low. Furthermore, a patient monitored by a general practitioner may have occasional  
34 visits to their specialist, who may order the tests, rather than the GP.  
35  
36  
37

38 This research will help define the extent to which evidence-based best practice guidelines influence  
39 decision making in general practices. To date, difficulties in obtaining patient data from EHR  
40 softwares have hindered studying pathology test ordering in general practice. This study will be one  
41 of the first in Australia to extensively investigate the impact of best practice guidelines on GP testing  
42 patterns. The study can ultimately lead to better efficiency in pathology testing and improvements in  
43 patient outcomes by providing much needed information on the adherence of GPs to pathology testing  
44 guidelines.  
45

### 46 47 **Ethics and Dissemination**

48 Ethics clearance to collect data from general practice facilities has been obtained by the data provider  
49 from the RACGP National Research and Evaluation Ethics Committee (NREEC 17-008). Approval  
50 for the research group to use these data has been obtained from Macquarie University (5201700872).  
51 The data will be de-identified and reported at an aggregate level, and the results will neither identify  
52 GPs nor patients.  
53

54 The results of this study will be reported to the Australian Government's Department of Health,  
55 disseminated in peer-reviewed academic journals, and presented in national and international  
56  
57  
58  
59

1  
2  
3 conferences and industry forums. The involvement of the PHNs in the research process also allows  
4 for the research findings to inform their activities at an early stage, reducing the usual ‘research into  
5 practice’ delay.  
6

### 7 **Contributors**

8 This study is jointly undertaken through a collaboration between Centre for Health Systems and  
9 Safety Research at Macquarie University, the Royal College of Pathologists of Australasia Quality  
10 Assurance Programs, POLAR Data Space (Outcome Health, Eastern Melbourne PHN, Gippsland  
11 PHN and South Eastern Melbourne PHN). AG initiated the project and led the development of the  
12 Quality Use of Pathology Program (QUPP) grant proposal. AG, JIW, LL, LP, TB, CP, and NR are  
13 chief investigators on the project and have contributed to the grant proposal and protocol in their area  
14 of expertise. From the PHNs, MS, RW, and ED contributed their expertise in general practice to the  
15 protocol. AM, from Outcome Health, has contributed his expertise in EHR data to the protocol. RAH,  
16 GS, and GSF are members of the project team and contributed to the protocol in relation to describing  
17 the procedures of data collection, validation, and analyses procedures. RAH and GS prepared the first  
18 draft of this protocol based on the grant proposal. All authors have reviewed and approved the final  
19 version of this protocol.  
20  
21  
22

### 23 **Funding**

24 This study is independently executed through funding by a grant from the Australian Government  
25 Department of Health, Quality Use of Pathology Program (Agreement ID: 4-2QFVW4M). This  
26 Australian national grants program aims to improve health and economic outcomes from pathology  
27 tests.  
28  
29

### 30 **Competing Interests**

31 None declared.  
32  
33

### 34 **REFERENCES**

- 35  
36  
37  
38  
39  
40  
41  
42  
43  
44  
45  
46  
47  
48  
49  
50  
51  
52  
53  
54  
55  
56  
57  
58  
59  
60
1. Harris MF, Jayasinghe UW, Taggart JR, Christl B, Proudfoot JG, Crookes PA, et al. Multidisciplinary Team Care Arrangements in the management of patients with chronic disease in Australian general practice. *Med J Aust.* 2011;194(5):236–239.
  2. Britt H, Miller G, Bayram C, Henderson J, Valenti L, Harrison C, et al. A decade of Australian general practice activity 2006-07 to 2015-16: BEACH : bettering the evaluation and care of health. 2016.
  3. Zhi M, Ding EL, Theisen-Toupal J, Whelan J, Arnaout R. The Landscape of Inappropriate Laboratory Testing: A 15-Year Meta-Analysis. *PLOS ONE.* 2013 Nov 15;8(11):e78962.
  4. Elshaug AG, Watt AM, Mundy L, Willis CD. Over 150 potentially low-value health care practices: an Australian study. *Med J Aust.* 2012 Nov 19;197(10):556–60.
  5. Bhatia RS, Levinson W, Shortt S, Pendrith C, Fric-Shamji E, Kallewaard M, et al. Measuring the effect of Choosing Wisely: an integrated framework to assess campaign impact on low-value care. *BMJ Qual Saf.* 2015 Aug;24(8):523–31.
  6. National Institute for Health and Care Excellence: Clinical Guidelines [Internet]. [cited 2018 Mar 26]. Available from: [www.nice.org.uk](http://www.nice.org.uk)

- 1
- 2
- 3 7. RACGP - Redbook Guidelines for preventive activities in general practice 9th edition [Internet].
- 4 [cited 2018 Mar 26]. Available from: <https://www.racgp.org.au/redbook>
- 5
- 6 8. What Physicians Say about the Problem, the Causes, and the Solutions: Results from a National
- 7 Survey of Physicians [Internet]. PerryUndem Research/Communication; 2014 May [cited 2018
- 8 Mar 26]. (Unnecessary Tests and Procedures In the Health Care System). Available from:
- 9 [http://www.choosingwisely.org/wp-content/uploads/2015/04/Final-Choosing-Wisely-Survey-](http://www.choosingwisely.org/wp-content/uploads/2015/04/Final-Choosing-Wisely-Survey-report.pdf)
- 10 [report.pdf](http://www.choosingwisely.org/wp-content/uploads/2015/04/Final-Choosing-Wisely-Survey-report.pdf)
- 11
- 12 9. Boyages SC. Vitamin D testing: new targeted guidelines stem the overtesting tide. *Med J Aust.*
- 13 2016 Jan 18;204(1):18.
- 14
- 15 10. Pearce C, Shearer M, Gardner K, Kelly J. A division's worth of data. *Aust Fam Physician.* 2011
- 16 Mar;40(3):167–70.
- 17
- 18 11. MedicineInsight. MedicineInsight Data Book version 1.1. [Internet]. NPS MedicineWise; [cited
- 19 2018 Mar 26]. Available from:
- 20 [https://cdn0.scrvt.com/08ab3606b0b7a8ea53fd0b40b1c44f86/475dedf8d41a8a72/88fd0674e](https://cdn0.scrvt.com/08ab3606b0b7a8ea53fd0b40b1c44f86/475dedf8d41a8a72/88fd0674e192/MedicineInsight-Data-Book-and-Dictionary_v1.1.pdf)
- 21 [192/MedicineInsight-Data-Book-and-Dictionary\\_v1.1.pdf](https://cdn0.scrvt.com/08ab3606b0b7a8ea53fd0b40b1c44f86/475dedf8d41a8a72/88fd0674e192/MedicineInsight-Data-Book-and-Dictionary_v1.1.pdf)
- 22
- 23 12. Gadzhanova S, Pratt N, Roughead E. Use of SGLT2 inhibitors for diabetes and risk of infection:
- 24 Analysis using general practice records from the NPS MedicineWise MedicineInsight program.
- 25 *Diabetes Res Clin Pract.* 2017 Aug;130:180–5.
- 26
- 27 13. Vandembroucke JP, Elm E von, Altman DG, Gøtzsche PC, Mulrow CD, Pocock SJ, et al.
- 28 Strengthening the Reporting of Observational Studies in Epidemiology (STROBE): Explanation
- 29 and Elaboration. *PLOS Med.* 2007 Oct 16;4(10):e297.
- 30
- 31 14. Gerson SL. Clozapine - deciphering the risks. *N Engl J Med.* 1993 Jul 15;329(3):204–5.
- 32
- 33 15. Filia SL, Wheelhouse A, Lee SJ, Main M, de Castella A, Wilkins S, et al. Transitioning patients
- 34 taking clozapine from the public to private/GP shared-care setting: barriers and criteria. *Aust N*
- 35 *Z J Psychiatry.* 2012 Mar;46(3):225–31.
- 36
- 37 16. Clozapine Management Clinical Guideline [Internet]. [cited 2018 Mar 26]. Available from:
- 38 [http://www.sahealth.sa.gov.au/wps/wcm/connect/059961804298b3078c77be80c298878e/Ci](http://www.sahealth.sa.gov.au/wps/wcm/connect/059961804298b3078c77be80c298878e/Clozapine+Management+Clinical+Guideline_13092017.pdf?MOD=AJPERES&CACHEID=059961804298b3078c77be80c298878e)
- 39 [ozapine+Management+Clinical+Guideline\\_13092017.pdf?MOD=AJPERES&CACHEID=05996180](http://www.sahealth.sa.gov.au/wps/wcm/connect/059961804298b3078c77be80c298878e/Clozapine+Management+Clinical+Guideline_13092017.pdf?MOD=AJPERES&CACHEID=059961804298b3078c77be80c298878e)
- 40 [4298b3078c77be80c298878e](http://www.sahealth.sa.gov.au/wps/wcm/connect/059961804298b3078c77be80c298878e/Clozapine+Management+Clinical+Guideline_13092017.pdf?MOD=AJPERES&CACHEID=059961804298b3078c77be80c298878e)
- 41
- 42 17. Safe and quality use of clozapine therapy in mental health services [Internet]. State of
- 43 Queensland; 2016 Nov. Report No.: QH-GDL-437:2016. Available from:
- 44 [https://www.health.qld.gov.au/\\_\\_data/assets/pdf\\_file/0025/625354/qh-gdl-437.pdf](https://www.health.qld.gov.au/__data/assets/pdf_file/0025/625354/qh-gdl-437.pdf)
- 45
- 46 18. Wysowski DK, Nourjah P, Swartz L. Bleeding complications with warfarin use: a prevalent
- 47 adverse effect resulting in regulatory action. *Arch Intern Med.* 2007 Jul 9;167(13):1414–9.
- 48
- 49 19. Tideman PA, Tirimacco R, St John A, Roberts GW. How to manage warfarin therapy. *Aust*
- 50 *Prescr.* 2015 Apr;38(2):44–8.
- 51
- 52 20. Guidelines for warfarin management in the community [Internet]. State of Queensland; 2016
- 53 p. 27. Available from: [https://www.health.qld.gov.au/clinical-practice/guidelines-](https://www.health.qld.gov.au/clinical-practice/guidelines-procedures/medicines?a=165945)
- 54 [procedures/medicines?a=165945](https://www.health.qld.gov.au/clinical-practice/guidelines-procedures/medicines?a=165945)
- 55
- 56
- 57
- 58
- 59
- 60

- 1  
2  
3 21. Menzin J, Hoesche J, Friedman M, Nichols C, Bergman G. E., Crowther M., et al. Failure to  
4 correct International Normalized Ratio and mortality among patients with warfarin-related  
5 major bleeding: an analysis of electronic health records. *J Thromb Haemost*. 2012 Mar  
6 30;10(4):596–605.  
7
- 8 22. Australian Government Department of Health. National Strategic Framework for Chronic  
9 Conditions [Internet]. [cited 2018 Mar 26]. Available from:  
10 <http://www.health.gov.au/internet/main/publishing.nsf/content/nsfcc>  
11
- 12 23. Choby B. Diabetes Update: Prevention and Management of Diabetes Complications. *FP Essent*.  
13 2017 May;456:36–40.  
14
- 15 24. The Royal Australian College of General Practitioners (RACGP) - General practice management  
16 of type 2 diabetes [Internet]. [cited 2018 Mar 26]. Available from:  
17 <https://www.racgp.org.au/your-practice/guidelines/diabetes/>  
18
- 19 25. Bilinski K, Boyages S. Evidence of overtesting for vitamin D in Australia: an analysis of 4.5 years  
20 of Medicare Benefits Schedule (MBS) data. *BMJ Open*. 2013 Jan 1;3(6):e002955.  
21
- 22 26. Position Statement: Use and Interpretation of Vitamin D testing [Internet]. The Royal College of  
23 Pathologists of Australia (RCPA); 2013 [cited 2018 Mar 26]. Available from:  
24 [https://www.rcpa.edu.au/Library/College-Policies/Position-Statements/Use-and-](https://www.rcpa.edu.au/Library/College-Policies/Position-Statements/Use-and-Interpretation-of-Vitamin-D-Testing)  
25 [Interpretation-of-Vitamin-D-Testing](https://www.rcpa.edu.au/Library/College-Policies/Position-Statements/Use-and-Interpretation-of-Vitamin-D-Testing)  
26
- 27 27. Gowda U, Smith BJ, Wluka AE, Fong DP, Kaur A, Renzaho AM. Vitamin D testing patterns  
28 among general practitioners in a major Victorian primary health care service. *Aust N Z J Public*  
29 *Health*. 2015 Aug 10;40(2):144–7.  
30
- 31 28. Surks MI, Ortiz E, Daniels GH, Sawin CT, Col NF, Cobin RH, et al. Subclinical thyroid disease:  
32 scientific review and guidelines for diagnosis and management. *JAMA*. 2004 Jan  
33 14;291(2):228–38.  
34
- 35 29. Walsh JP. Managing thyroid disease in general practice. *Med J Aust*. 2016 Aug 15;205(4):179–  
36 84.  
37
- 38 30. Ladenson PW, Singer PA, Ain KB, Bagchi N, Bigos ST, Levy EG, et al. American Thyroid  
39 Association guidelines for detection of thyroid dysfunction. *Arch Intern Med*. 2000 Jun  
40 12;160(11):1573–5.  
41
- 42 31. Liaw S-T, Taggart J, Yu H, de Lusignan S. Data extraction from electronic health records -  
43 existing tools may be unreliable and potentially unsafe. *Aust Fam Physician*. 2013  
44 Nov;42(11):820–3.  
45
- 46 32. Young J, Eley D, Fahey P, Patterson E, Hegney D. Enabling research in general practice--  
47 increasing functionality of electronic medical records. *Aust Fam Physician*. 2010 Jul;39(7):506–  
48 9.  
49  
50  
51  
52  
53  
54  
55  
56  
57  
58  
59
